<sup>1</sup> Manuscript submitted to *Biophysical Journal*

## <sup>2</sup> Computational Tools

# <sup>3</sup> Moleculewise semi-grand canonical ensembles

<sup>4</sup> M. Girard<sup>1,\*</sup> and T. Bereau<sup>1,2</sup>

### <sup>9</sup> ABSTRACT

<sup>10</sup> The plasma membrane is the interface between cells and exterior media. While its existence has been known for a long time,  
<sup>11</sup> organization of its constituent lipids remain a challenge. Recently, we have proposed that lipid populations may be controlled  
<sup>12</sup> by chemical potentials of different lipid species, resulting in semi-grand canonical thermodynamic ensembles. However, the  
<sup>13</sup> currently available molecular dynamics software packages do not allow for molecule-based chemical potentials. Here, we pro-  
<sup>14</sup> pose a variation on existing algorithms that allow defining chemical potentials for molecules. Additionally, we allow coupling with  
<sup>15</sup> collective variables and show that it can be used to dynamically create asymmetric membranes. We release an implementation  
<sup>16</sup> of the algorithm for the HOOMD-Blue molecular dynamics engine.

<sup>17</sup> SIGNIFICANCE We demonstrate an algorithm that allows for simulations of molecules in the semi-grand canonical  
<sup>18</sup> ensemble. It also allows coupling the chemical potential values to collective variable and create asymmetric membranes.

### <sup>19</sup> INTRODUCTION

<sup>20</sup> Membranes in eukaryote cell are mostly comprised of lipids,  
<sup>21</sup> with particularly complex chemistry and organization. A typ-  
<sup>22</sup> ical mammal cell has hundreds of different lipids types in  
<sup>23</sup> any of its membranes, distributed asymmetrically between  
<sup>24</sup> both leaflets (1, 2). The chemical nature of lipids — overall  
<sup>25</sup> headgroup composition, acyl tail length, unsaturation — is  
<sup>26</sup> maintained by the Lands' cycle in the endoplasmic reticulum.  
<sup>27</sup> The asymmetric distribution is maintained by **type IV P-type**  
<sup>28</sup> **ATPase (P4-ATPASE)** proteins, also known as flippases, em-  
<sup>29</sup> bedded in the membrane itself, which consume ATP in order  
<sup>30</sup> to move lipids from one leaflet to the other. Given the length  
<sup>31</sup> to which cells go to maintain their lipid composition, one can  
<sup>32</sup> ask: why do cells require such a complex chemistry? Com-  
<sup>33</sup> puter simulations have proven excellent to garner insights  
<sup>34</sup> into behavior of simple model membranes, and is moving  
<sup>35</sup> towards realistic biological chemistry (3). For instance, the  
<sup>36</sup> MARTINI model (4) has been used to model realistic sim-  
<sup>37</sup> ulations of plasma membranes (5). However, understanding  
<sup>38</sup> the underlying fundamental reasons for membrane compo-  
<sup>39</sup> sition and asymmetry requires systematic variations of the  
<sup>40</sup> myriad of potential compositions. Moreover, simulations in-  
<sup>41</sup> volving asymmetric compositions must be done carefully as  
<sup>42</sup> differential stress can exist in the membrane (6).

<sup>43</sup> A related question is: how do membrane regulate their  
<sup>44</sup> composition? Giant plasma membrane vesicles—vesicles  
<sup>45</sup> extracted from plasma membranes that retain composition—

<sup>46</sup> are known to possess a miscibility transition temperature just  
<sup>47</sup> under cell growth temperature (7), which is in all appear-  
<sup>48</sup> ance critical (8), clearly showing that lipid composition is  
<sup>49</sup> responsive to environmental changes. Computer simulations  
<sup>50</sup> are moving towards biologically relevant compositions (3);  
<sup>51</sup> yet are still unable to correctly model regulation as it involves  
<sup>52</sup> chemical reactions and lipid diffusion between membranes in  
<sup>53</sup> cells. The problem appears enigmatic in experiments as well:  
<sup>54</sup> no sophisticated sensing mechanism has been observed to  
<sup>55</sup> precisely control the large amount of lipids types in mem-  
<sup>56</sup> branes. We recently hypothesized that regulation of phospho-  
<sup>57</sup> lipids in cells may be loose, and controlled by their chemical  
<sup>58</sup> potential, while other components such as cholesterol may  
<sup>59</sup> be tightly regulated (9). We named this configuration regu-  
<sup>60</sup> lated ensembles, and it thermodynamically corresponds to  
<sup>61</sup> mixtures of canonical and **semi-grand canonical (SGC)** en-  
<sup>62</sup> sembles — the thermodynamic ensemble where chemical po-  
<sup>63</sup> tential differences between molecules is fixed. In simulations,  
<sup>64</sup> some components can change their chemical nature over time,  
<sup>65</sup> while their overall number is constrained. Subsequently, we  
<sup>66</sup> have shown that this naturally self-regulates towards critical  
<sup>67</sup> points, in a robust fashion (10).

<sup>68</sup> Here, we present the software we employed to simulate  
<sup>69</sup> lipids in **SGC** ensembles in (9). There already exists a highly  
<sup>70</sup> parallel algorithm for **SGC** (11), available in multiple molec-  
<sup>71</sup> ular dynamics packages, e.g. LAMMPS and openMM (12).  
<sup>72</sup> However, it lacks two features for membrane simulations.

73 First, it is unable to capture chemical potentials of molecules.  
 74 Second, it does not allow coupling to collective variables.  
 75 This is important for biological membranes as chemical po-  
 76 tentials on the two leaflets are different. In order to resolve  
 77 this, we extend the method to associate a chemical potential  
 78 to any arbitrary combination of chemistry, charge state and  
 79 collective variable. We release an implementation running  
 80 on graphical processing units in the HOOMD-Blue molec-  
 81 ular dynamics engine (13, 14). We use this implementation  
 82 to simulate a lipid bilayer with an asymmetric composition.  
 83 In order to do this, we postulate that P4-ATPase induces a  
 84 chemical potential difference that only depends on headgroup  
 85 nature (phosphatidylcholine (PC) vs phosphatidyletholamine  
 86 (PE)). This proxy allows us to dynamically create the asym-  
 87 metry and relate the work done by P4-ATPase on lipids to  
 88 create the asymmetric profile.

## 89 METHODS

90 The algorithm employed here makes use of a simulation do-  
 91 main checkerboard decomposition (see Fig 1A) in the same  
 92 fashion as (11). The simulation box is decomposed into cells  
 93 of minimal thickness  $\sigma$ , where  $\sigma$  is the largest interaction  
 94 range in the system. Particles located at least two cells  
 95 away from each other are therefore non-interacting. Every update  
 96 step, the algorithm selects a set of non-interacting cells (de-  
 97 picted in blue in Fig 1A). Within this set of active cells,  
 98 one particle is randomly selected and a swap is attempted,  
 99 with acceptance determined by the usual Metropolis crite-  
 100 rion  $\exp(-\beta(\Delta U - \Delta\mu))$ , where  $\beta = (k_B T)^{-1}$ ,  $\Delta U$  is the  
 101 internal energy change and  $\Delta\mu$  the chemical potential differ-  
 102 ence between the two species.

103 To associate a chemical potential to a given molecule, we  
 104 need to assign a unique number—a hash—to a given chemi-  
 105 cal structure. This hash needs to include collective variables,  
 106 such as leaflet, if they are relevant to chemical potential val-  
 107 ues. To construct this hash, we simply aggregate all potential  
 108 chemical states of beads in a molecule. As a relevant example,  
 109 let us consider the coarse-grained lipid depicted in Fig. 1B.  
 110 For this particular lipid, which we depict using the coarse-  
 111 grained MARTINI force field (4), seven beads can change  
 112 their chemical type. First the headgroup (red) can change be-  
 113 tween PC ( $Q_0$  MARTINI beadtype) and PE ( $Q_d$ ). The green  
 114 beads can either correspond to saturated ( $C_1$ ) or unsaturated  
 115 ( $C_3$ ) states. The last bead, in blue, is used to change the  
 116 length of the acyl tail: it can either be saturated, unsaturated  
 117 or "ghost" (empty). The hash is constructed from the mini-  
 118 mal binary representation: a two-state bead occupies one bit,  
 119 while a three-state bead occupies two bits. Some of the hash  
 120 values may correspond to unphysical states, for instance the  
 121 same binary representation is used for both three- and four-  
 122 state beads. Additionally, some states may be chemically un-  
 123 available, e.g. non-contiguous unsaturations in biologically  
 124 relevant lipids. Both unphysical and chemically unavailable  
 125 states are assigned a chemical potential  $\mu = -\infty$  to forbid any

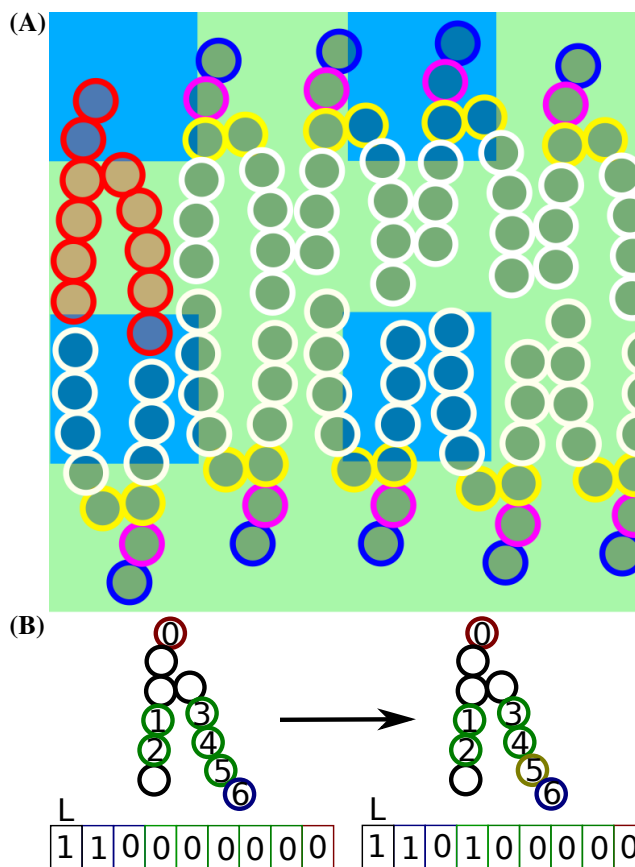

Figure 1: SGC algorithm employed. A) 2D representation of the checkerboard decomposition for a lipid membrane; lipids are drawn in MARTINI representation with standard MARTINI coloring, checkerboard is in green and active cells in blue. A random particle is chosen within each active cell for an alchemical transformation. Since the red molecule stretches across multiple active cells, it is pathological and can lead to data races. B) Calculation of the molecule hash for a typical molecule in a bilayer, with colour indicative of SGC representation. Every bead in the molecule is assigned an offset in the hash so that changes in hash can be directly computed by changing the relevant bits. For instance, an alchemical transformation of bead labeled 5 from green (state 0) to gold (state 1) results in a change of bit 5 of the hash. Discrete, finite-valued collective variables such as leaflet side can be directly incorporated into the hash as well, represented here with a value of 1 for the upper leaflet.

126 alchemical transformation involving these states.

127 The Monte-Carlo procedure (see Alg. 1) is similar to (11),  
128 but require a few more memory transactions. Effectively, af-  
129 ter picking a random particle, the algorithm must resolve to  
130 which molecule the particle belongs, followed by retrieving  
131 the hash of the molecule. A new random state for the particle  
132 is then generated, as well as its associated hash. Computing  
133 the new hash requires resolving the hash offset of the cur-  
134 rent bead. Additionally, this procedure implies that parallel  
135 transformations on the same molecule result in data races for  
136 hashes — read and write commands occurring at the same  
137 time from multiple threads resulting in corrupt data states.  
138 Therefore, large molecules, which span multiple active cells  
139 (see red molecule on Fig 1), are pathological. To solve this,  
140 we add a molecular lock to prevent multiple changes to the  
141 same molecule within a single Monte-Carlo step.

---

### Algorithm 1 Monte-Carlo Procedure

---

**for**  $c$  in active cells **do**

$p \leftarrow$  random particle  $\in c$

$\text{mol} \leftarrow \text{MoleculeIndex}[p]$

$\text{molHash} \leftarrow \text{Hash}[\text{mol}]$

$o \leftarrow \text{Offset}[p]$

$s \leftarrow \text{States}[p]$

$s' \leftarrow$  Random state  $\neq s$

$\text{molHash}' \leftarrow (\text{Hash} \& \sim (\text{mask} \ll o)) | (s' \ll o)$

$\Delta U \leftarrow U[s'] - U[s]$

$\Delta\mu \leftarrow \mu[\text{molHash}'] - \mu[\text{molHash}]$

**if**  $R(0, 1) < \exp(-\beta(\Delta U - \Delta\mu))$  **then**

lock  $\leftarrow$  atomicCAS(&Lock[mol], 0, 1)

**if** lock **then return**

Hash[mol]  $\leftarrow$  molHash'

States[p]  $\leftarrow$   $s'$

---

142 The base-2 representation for chemical states ensures  
143 high numerical performances as alchemical changes can be  
144 directly computed through bitwise operations. This comes at  
145 the cost of chemical space; for instance, in Fig 1B, the fourth  
146 state of the blue bits (11) does not represent a meaningful  
147 physical state. Since we use 32-bit integers for hashes, the  
148 worst case scenarios involve either losing a chemical state  
149 every two bits (e.g. a molecule composed of only blue bits in  
150 Fig 1), leading to  $3^{16} = 4.3 \cdot 10^6$  chemical species, or using  
151 beads with more than  $2^{16} + 1 = 65537$  chemical states; in  
152 which case there can be only a single such bead per molecule.  
153 To our knowledge, no simulation has attempted mixtures of  
154 more than  $2^{16}$  components yet and we believe that this is  
155 sufficient.

156 If the chemical potential is dependent on a collective vari-  
157 able, for instance if chemical potentials are different on the  
158 two leaflets of a membrane, then the system is out of equilib-  
159 rium. These systems can exhibit peculiar properties, such as  
160 net flows, which tend to depend on kinetic rates in the system.  
161 In order to use chemical potentials to describe the system,

162 the natural relaxation timescale of the system (e.g. flip-flop  
163 for asymmetric phospholipids bilayers) must be much longer  
164 than simulation timescales. If the natural relaxation timescale  
165 is similar to simulation timescales, then the system will ex-  
166 hibit properties that are dependent on simulation condition  
167 choices, and particularly the SGC relaxation timescale which  
168 creates the out-of-equilibrium conditions.

## 169 RESULTS

170 In order to demonstrate the value of our method, we take  
171 a look at a biologically relevant system: a membrane with  
172 an asymmetric lipid composition. We simulate a membrane  
173 comprised of PC and PE. On the lower leaflet, we impose  
174  $\Delta\mu = 0$  between any two chemical species. This results in a  
175 higher proportion of PE present due to hydrogen bonds form-  
176 ing between their headgroups, with  $\approx 88\%$  of lipids being  
177 PE. On the upper leaflet, we impose a difference between  
178 PC and PE molecules of  $\Delta\mu$  to proxy effects of P4-ATPase  
179 proteins. As outlined in the introduction, this assumes that  
180 P4-ATPase binds all PC molecules equally, independently  
181 of acyl tail nature.

182 To measure asymmetry, we define the headgroup asym-  
183 metry parameter  $\delta^\pm = (N_{\text{PC}}^\pm - N_{\text{PE}}^\pm)/N$ , which measures how  
184 different the headgroup populations are on each leaflet (see  
185 Fig 2). As expected  $\delta^+$  shows a sigmoid-like behavior, where  
186 the free energy is largely dominated by the mixing entropy  
187 at large values of  $\Delta\mu$ . The value of  $\delta^\pm = 0$  is not reached  
188 at  $\Delta\mu = 0$ , due to hydrogen bonding occurring between PE  
189 heads. The composition of the lower leaflet barely changes,  
190 indicative of absence of coupling between headgroup com-  
191 positions of both leaflets. The two curves intersect at  $\Delta\mu = 0$ ,  
192 as expected.

193 Beyond resulting in asymmetric membranes, this simula-  
194 tion also yields an important result: P4-ATPase proteins need  
195 to exert  $\approx 20$  kJ/mol of work on lipids to create a strongly  
196 PC-dominated upper leaflet. This value is compatible with  
197 free energy release during hydrolysis of ATP ( $\approx 30$  kJ/mol).

198 This algorithm has  $O(N \log N)$  time-complexity since  
199 the amount of Monte-Carlo attempts in a single step grow lin-  
200 early with system size. This means that it can be used to study  
201 large-scale systems, for instance to do finite-size scaling of  
202 critical membranes. Additionally, if the membrane has only  
203 a single SGC ensemble and no unregulated components —  
204 molecules whose chemistry cannot change, e.g. cholesterol —  
205 , equilibration becomes independent of long-range diffusion.  
206 This is similar to the molecular dynamics coupled with al-  
207 chemical steps, where two lipid chemical states are swapped  
208 in composition-conserving non-equilibrium transformations  
209 (15, 16). However, only a single non-equilibrium move can be  
210 attempted per update, which in turn implies a  $O(N^2 \log(N))$   
211 time complexity.

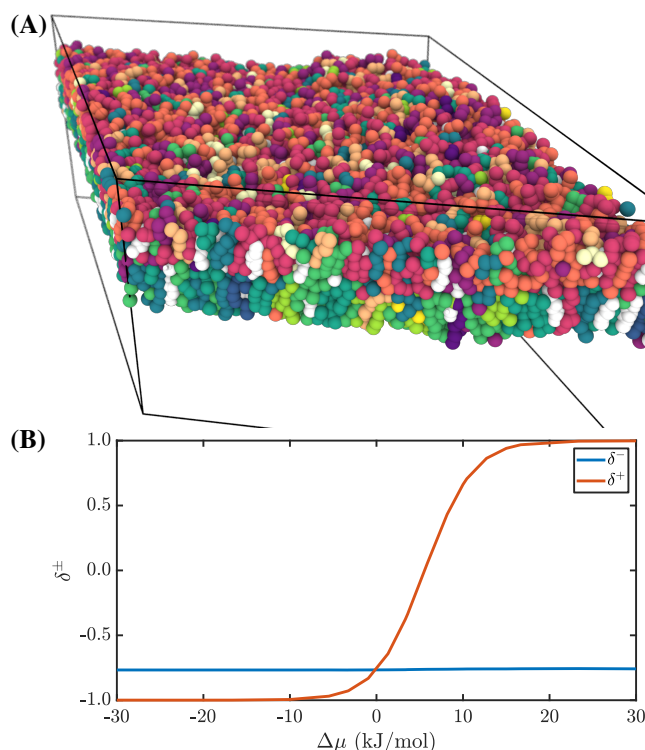

Figure 2: Asymmetric membrane properties. A) Snapshot of a typical configuration at  $\Delta\mu = 10$  kJ/mol. Cholesterol is coloured in white, while PC and PE are coloured according to their unsaturation level on different color scales to differentiate them. B) Resulting headgroup asymmetry  $\delta^\pm$ . At  $\Delta\mu = 0$ , PE molecules dominate both layers, with  $\approx 88\%$  of molecules being PE. The composition of the lower leaflet is nearly unaffected by the changes of the upper leaflet.

## 212 CONCLUSION

213 We developed a molecule-wise SGC algorithm that enables  
214 simulation of lipid membranes with distinct sets of chemi-  
215 cal potentials on different leaflets. This results in membranes  
216 with asymmetric composition between the two leaflets. We  
217 hope that the simulation tools deployed here will enable re-  
218 search into regulated ensembles proposed in (9) and into  
219 properties of asymmetric membranes.

## 220 AUTHOR CONTRIBUTIONS

221 M.G. and T.B. designed the research. M.G. wrote the soft-  
222 ware, carried out simulations, analyzed the data. M.G. and  
223 T.B. wrote the article.

## 224 ACKNOWLEDGMENTS

225 We thank Nikita Tretyakov for a critical reading of this  
226 manuscript. This project was supported by the Alexander  
227 von Humboldt-Stiftung (AvH) and the Deutsche Forschungs-  
228 gemeinschaft (DFG). We acknowledge usage of computa-  
229 tional resources from the Max-Planck Computing and Data  
230 Facilities (MPCDF).

## 231 SOFTWARE

232 Molecular dynamics simulations make use of the HOOMD-  
233 Blue engine (13, 14, 17), a DPD thermostat (18) and the  
234 MARTINI force-field (4). Initial topologies are built using  
235 the hoobas molecular builder (19). The SGC HOOMD-Blue  
236 plugin for HOOMD-version 2.9.3 is available in supplemen-  
237 tary material, as well as on [https://gitlab.mpcdf.mpg.](https://gitlab.mpcdf.mpg.de/mgirard/SGC-molecules)  
238 [de/mgirard/SGC-molecules](https://gitlab.mpcdf.mpg.de/mgirard/SGC-molecules).

## 239 REFERENCES

- 240 1. Jos A. F. Op den Kamp. “Lipid Asymmetry in Mem-  
241 branes”. In: *Annual Review of Biochemistry* 48.1 (1979).  
242 \_eprint: <https://doi.org/10.1146/annurev.bi.48.070179.000403>,  
243 pp. 47–71. DOI: [10.1146/annurev.bi.48.070179.](https://doi.org/10.1146/annurev.bi.48.070179.000403)  
244 [000403](https://doi.org/10.1146/annurev.bi.48.070179.000403). URL: [https://doi.org/10.1146/annurev.](https://doi.org/10.1146/annurev.bi.48.070179.000403)  
245 [bi.48.070179.000403](https://doi.org/10.1146/annurev.bi.48.070179.000403) (visited on 09/24/2020).
- 246 2. A. J Verkleij et al. “The asymmetric distribution of  
247 phospholipids in the human red cell membrane. A com-  
248 bined study using phospholipases and freeze-etch elec-  
249 tron microscopy”. en. In: *Biochimica et Biophysica Acta*  
250 *(BBA) - Biomembranes* 323.2 (1973), pp. 178–193. ISSN:  
251 0005-2736. DOI: [10.1016/0005-2736\(73\)90143-0](https://doi.org/10.1016/0005-2736(73)90143-0).  
252 URL: [http://www.sciencedirect.com/science/](http://www.sciencedirect.com/science/article/pii/0005273673901430)  
253 [article/pii/0005273673901430](http://www.sciencedirect.com/science/article/pii/0005273673901430) (visited on 09/24/2020).
- 254 3. Siewert J. Marrink et al. “Computational Modeling of  
255 Realistic Cell Membranes”. In: *Chemical Reviews* 119.9  
256 (2019). Publisher: American Chemical Society, pp. 6184–  
257 6226. ISSN: 0009-2665. DOI: [10.1021/acs.chemrev](https://doi.org/10.1021/acs.chemrev).



- 258 [8b00460](https://doi.org/10.1021/acs.chemrev.8b00460). URL: <https://doi.org/10.1021/acs.chemrev.8b00460> (visited on 09/24/2020).
- 259
- 260 4. Siewert J. Marrink et al. “The MARTINI Force Field: Coarse Grained Model for Biomolecular Simulations”. In: *The Journal of Physical Chemistry B* 111.27 (2007), pp. 7812–7824. ISSN: 1520-6106. DOI: [10.1021/jp071097f](https://doi.org/10.1021/jp071097f). URL: <https://doi.org/10.1021/jp071097f> (visited on 07/23/2019).
- 261
- 262
- 263
- 264
- 265
- 266 5. Helgi I. Ingólfsson et al. “Lipid Organization of the Plasma Membrane”. In: *Journal of the American Chemical Society* 136.41 (2014), pp. 14554–14559. ISSN: 0002-7863. DOI: [10.1021/ja507832e](https://doi.org/10.1021/ja507832e). URL: <https://doi.org/10.1021/ja507832e> (visited on 11/13/2019).
- 267
- 268
- 269
- 270
- 271 6. Amirali Hossein and Markus Deserno. “Spontaneous Curvature, Differential Stress, and Bending Modulus of Asymmetric Lipid Membranes”. en. In: *Biophysical Journal* 118.3 (2020), pp. 624–642. ISSN: 0006-3495. DOI: [10.1016/j.bpj.2019.11.3398](https://www.sciencedirect.com/science/article/pii/S0006349519343929). URL: <http://www.sciencedirect.com/science/article/pii/S0006349519343929> (visited on 09/23/2020).
- 272
- 273
- 274
- 275
- 276
- 277
- 278 7. Margaret Burns et al. “Miscibility Transition Temperature Scales with Growth Temperature in a Zebrafish Cell Line”. In: *Biophysical Journal* 113.6 (2017), pp. 1212–1222. ISSN: 0006-3495. DOI: [10.1016/j.bpj.2017.04.052](https://www.sciencedirect.com/science/article/pii/S0006349517305052). URL: <http://www.sciencedirect.com/science/article/pii/S0006349517305052> (visited on 07/23/2019).
- 279
- 280
- 281
- 282
- 283
- 284
- 285 8. Sarah L. Veatch et al. “Critical Fluctuations in Plasma Membrane Vesicles”. In: *ACS Chemical Biology* 3.5 (2008), pp. 287–293. ISSN: 1554-8929. DOI: [10.1021/cb800012x](https://doi.org/10.1021/cb800012x). URL: <https://doi.org/10.1021/cb800012x> (visited on 04/14/2020).
- 286
- 287
- 288
- 289
- 290 9. Martin Girard and Tristan Bereau. “Regulating Lipid Composition Rationalizes Acyl Tail Saturation Homeostasis in Ectotherms”. en. In: *Biophysical Journal* (2020). ISSN: 0006-3495. DOI: [10.1016/j.bpj.2020.07.024](https://www.sciencedirect.com/science/article/pii/S0006349520305889). URL: <http://www.sciencedirect.com/science/article/pii/S0006349520305889> (visited on 08/18/2020).
- 291
- 292
- 293
- 294
- 295
- 296 10. Martin Girard and Tristan Bereau. “Finite-size transitions in complex membranes”. Submitted, 2020.
- 297
- 298 11. Babak Sadigh et al. “Scalable parallel Monte Carlo algorithm for atomistic simulations of precipitation in alloys”. In: *Physical Review B* 85.18 (2012), p. 184203. DOI: [10.1103/PhysRevB.85.184203](https://link.aps.org/doi/10.1103/PhysRevB.85.184203). URL: <https://link.aps.org/doi/10.1103/PhysRevB.85.184203> (visited on 07/23/2019).
- 299
- 300
- 301
- 302
- 303
- 304 12. Gregory A. Ross et al. “Biomolecular Simulations under Realistic Macroscopic Salt Conditions”. In: *The journal of physical chemistry. B* 122.21 (2018), pp. 5466–5486. ISSN: 1520-6106. DOI: [10.1021/acs.jpccb.7b11734](https://www.ncbi.nlm.nih.gov/pmc/articles/PMC6078207/). URL: <https://www.ncbi.nlm.nih.gov/pmc/articles/PMC6078207/> (visited on 09/24/2020).
- 305
- 306
- 307
- 308
- 309
- 310 13. Joshua A. Anderson, Chris D. Lorenz, and A. Travasset. “General purpose molecular dynamics simulations fully implemented on graphics processing units”. In: *Journal of Computational Physics* 227.10 (2008), pp. 5342–5359. ISSN: 0021-9991. DOI: [10.1016/j.jcp.2008.01.047](http://www.sciencedirect.com/science/article/pii/S0021999108000818). URL: <http://www.sciencedirect.com/science/article/pii/S0021999108000818> (visited on 07/23/2019).
- 311
- 312
- 313
- 314
- 315
- 316
- 317
- 318 14. Jens Glaser et al. “Strong scaling of general-purpose molecular dynamics simulations on GPUs”. In: *Computer Physics Communications* 192 (2015), pp. 97–107. ISSN: 0010-4655. DOI: [10.1016/j.cpc.2015.02.028](http://www.sciencedirect.com/science/article/pii/S0010465515000867). URL: <http://www.sciencedirect.com/science/article/pii/S0010465515000867> (visited on 07/23/2019).
- 319
- 320
- 321
- 322
- 323
- 324 15. Yevhen K. Cherniavskiy et al. “Computer simulations of a heterogeneous membrane with enhanced sampling techniques”. In: *The Journal of Chemical Physics* 153.14 (2020). Publisher: American Institute of Physics, p. 144110. ISSN: 0021-9606. DOI: [10.1063/5.0014176](https://aip.scitation.org/doi/10.1063/5.0014176). URL: <https://aip.scitation.org/doi/10.1063/5.0014176> (visited on 10/16/2020).
- 325
- 326
- 327
- 328
- 329
- 330 16. Arman Fathizadeh and Ron Elber. “A mixed alchemical and equilibrium dynamics to simulate heterogeneous dense fluids: Illustrations for Lennard-Jones mixtures and phospholipid membranes”. In: *The Journal of Chemical Physics* 149.7 (2018). Publisher: American Institute of Physics, p. 072325. ISSN: 0021-9606. DOI: [10.1063/1.5027078](https://aip.scitation.org/doi/10.1063/1.5027078). URL: <https://aip.scitation.org/doi/10.1063/1.5027078> (visited on 10/16/2020).
- 331
- 332
- 333
- 334
- 335
- 336
- 337 17. Joshua A. Anderson, Jens Glaser, and Sharon C. Glotzer. “HOOMD-blue: A Python package for high-performance molecular dynamics and hard particle Monte Carlo simulations”. en. In: *Computational Materials Science* 173 (2020), p. 109363. ISSN: 0927-0256. DOI: [10.1016/j.commatsci.2019.109363](http://www.sciencedirect.com/science/article/pii/S0927025619306627). URL: <http://www.sciencedirect.com/science/article/pii/S0927025619306627> (visited on 10/29/2020).
- 338
- 339
- 340
- 341
- 342
- 343
- 344
- 345
- 346 18. Carolyn L. Phillips, Joshua A. Anderson, and Sharon C. Glotzer. “Pseudo-random number generation for Brownian Dynamics and Dissipative Particle Dynamics simulations on GPU devices”. en. In: *Journal of Computational Physics* 230.19 (2011), pp. 7191–7201. ISSN: 0021-9991. DOI: [10.1016/j.jcp.2011.05.021](http://www.sciencedirect.com/science/article/pii/S0021999111003329). URL: <http://www.sciencedirect.com/science/article/pii/S0021999111003329> (visited on 10/29/2020).
- 347
- 348
- 349
- 350
- 351
- 352
- 353
- 354
- 355 19. Martin Girard et al. “Hoobas: A highly object-oriented builder for molecular dynamics”. In: *Computational Materials Science* 167 (2019), pp. 25–33. ISSN: 0927-0256. DOI: [10.1016/j.commatsci.2019.05.003](http://www.sciencedirect.com/science/article/pii/S0927025619302745). URL: <http://www.sciencedirect.com/science/article/pii/S0927025619302745> (visited on 09/05/2019).
- 356
- 357
- 358
- 359
- 360

<sup>361</sup> **SUPPLEMENTARY MATERIAL**

<sup>362</sup> An online supplement to this article can be found by visiting

<sup>363</sup> BJ Online at <http://www.biophysj.org>.
